# Supplementary material for: Global Analyses of Multi-Locus Sequence Typing Data Reveal Geographic Differentiation, Hybridization, and Recombination in the Cryptococcus gattii Species Complex
Source: MDPI journal article supplement (doi:10.3390/jof9020276), 2023-02-20
Supplement: s1 [file s1]

Tree scale: 0.01

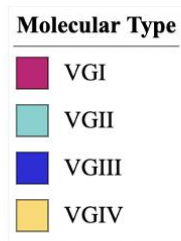

ST402

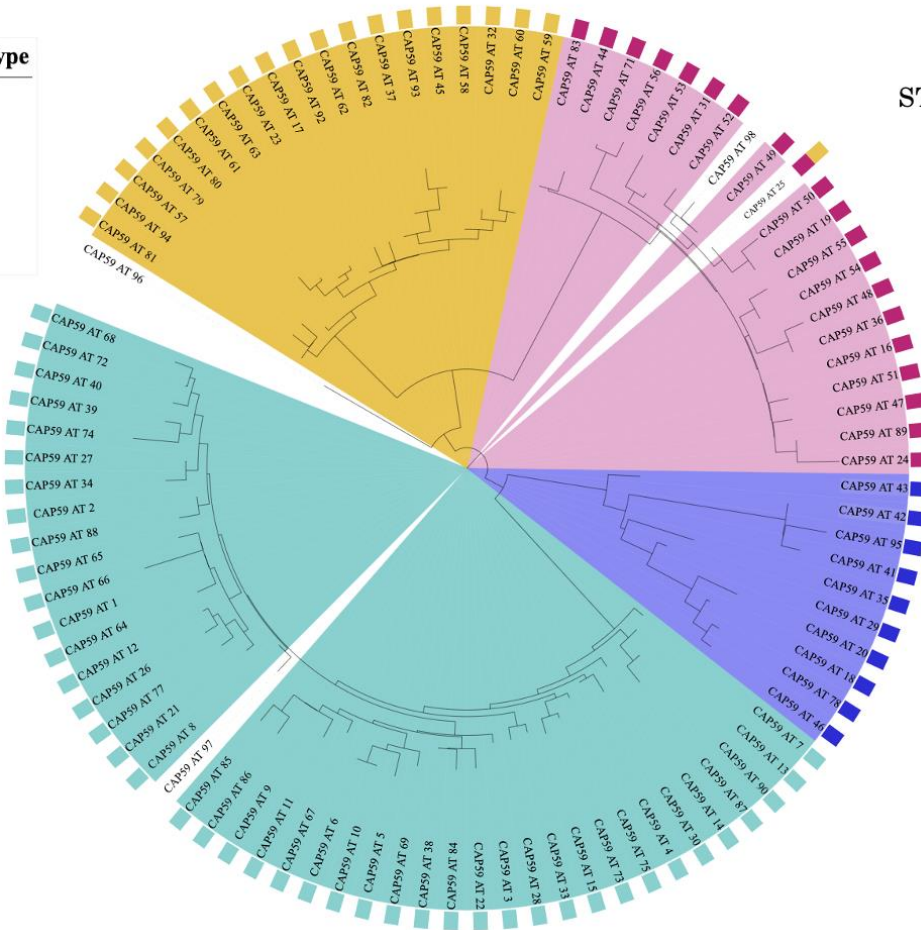

SF1: Phylogenetic tree illustrating the relationship among allele types (AT) found at the CAP59 locus of the *C. gattii* species complex. Four colours are used to display which lineage each AT is recorded in. Legends on the left indicate which colour corresponds to which lineage.

Tree scale: 0.01

# Molecular Type

- VGI
- VGII
- VGIII
- VGIV

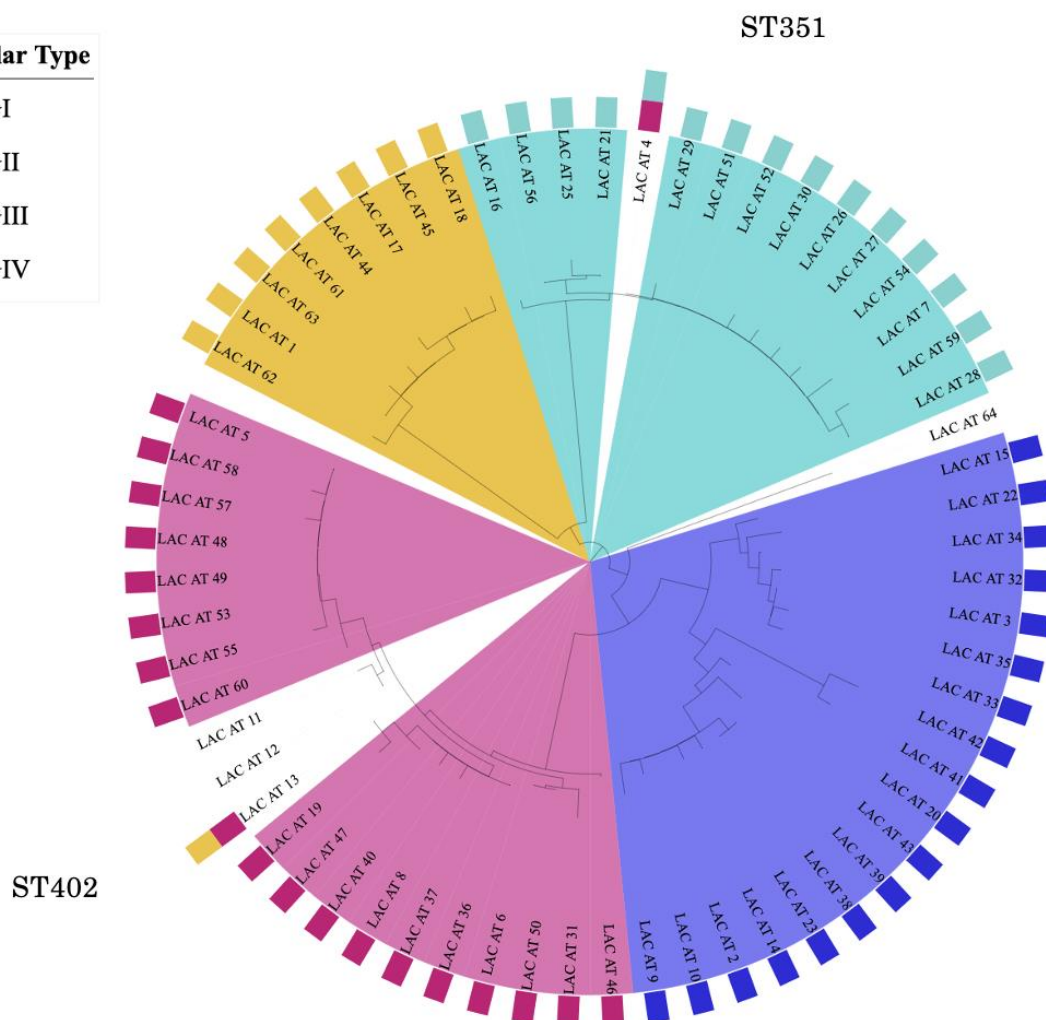

SF2: Phylogenetic tree illustrating the relationship among allele types (AT) found at the *LAC1* locus of the *C. gattii* species complex. Four colours are used to display which lineage each AT is recorded in. Legends on the left indicate which colour corresponds to which lineage.

Tree scale: 0.01

# Molecular Type

- VGI
- VGII
- VGIII
- VGIV

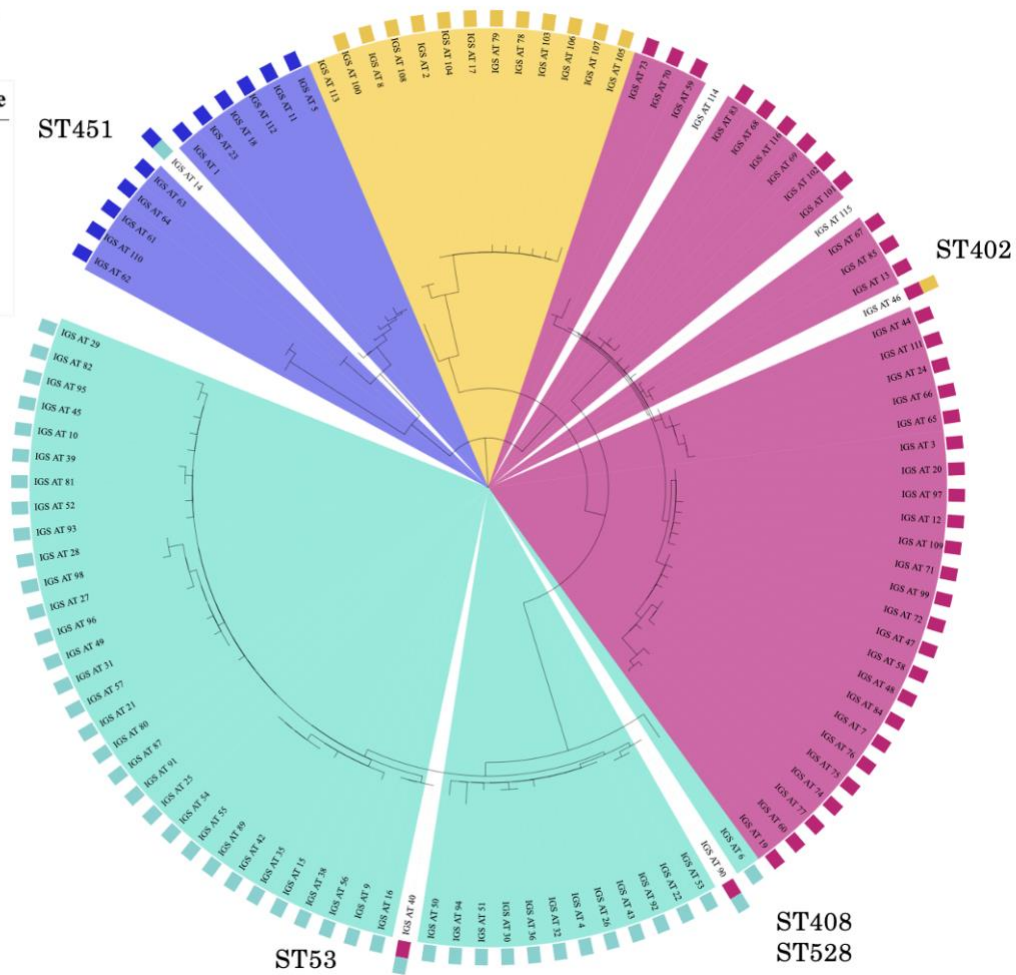

ST3: Phylogenetic tree illustrating the relationship among allele types (AT) found at the *IGS1* locus of the *C. gattii* species complex. Four colours are used to display which lineage each AT is recorded in. Legends on the left indicate which colour corresponds to which lineage.

Tree scale: 0.01

**Molecular Type**

- VGI
- VGII
- VGIII
- VGIV

VGIII  
ST335  
VGIV  
ST402

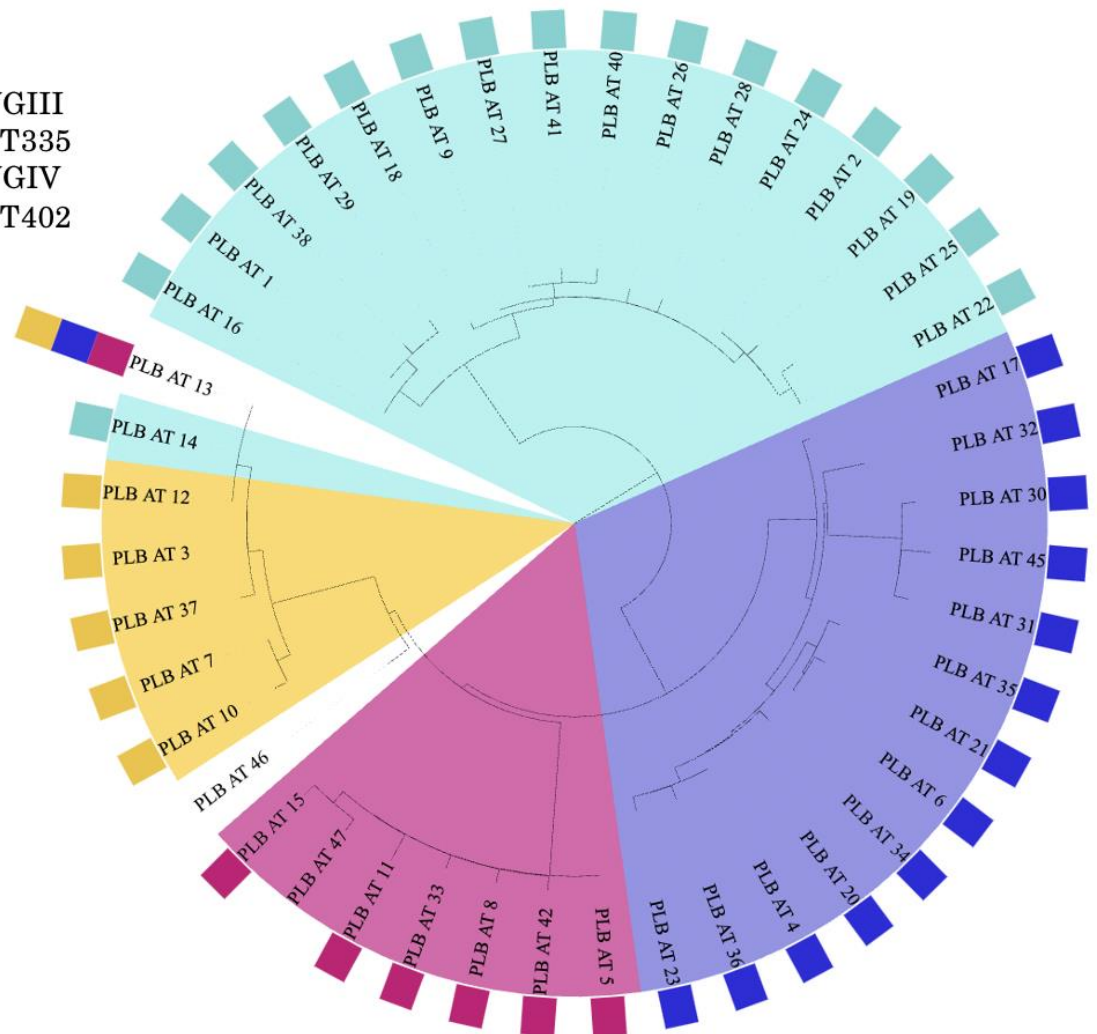

SF4: Phylogenetic tree illustrating the relationship among allele types (AT) found at the *PLB1* locus of the *C. gattii* species complex. Four colours are used to display which lineage each AT is recorded in. Legends on the left indicate which colour corresponds to which lineage.

Tree scale: 0.01

# Molecular Type

- VG I
- VG II
- VG III
- VG IV

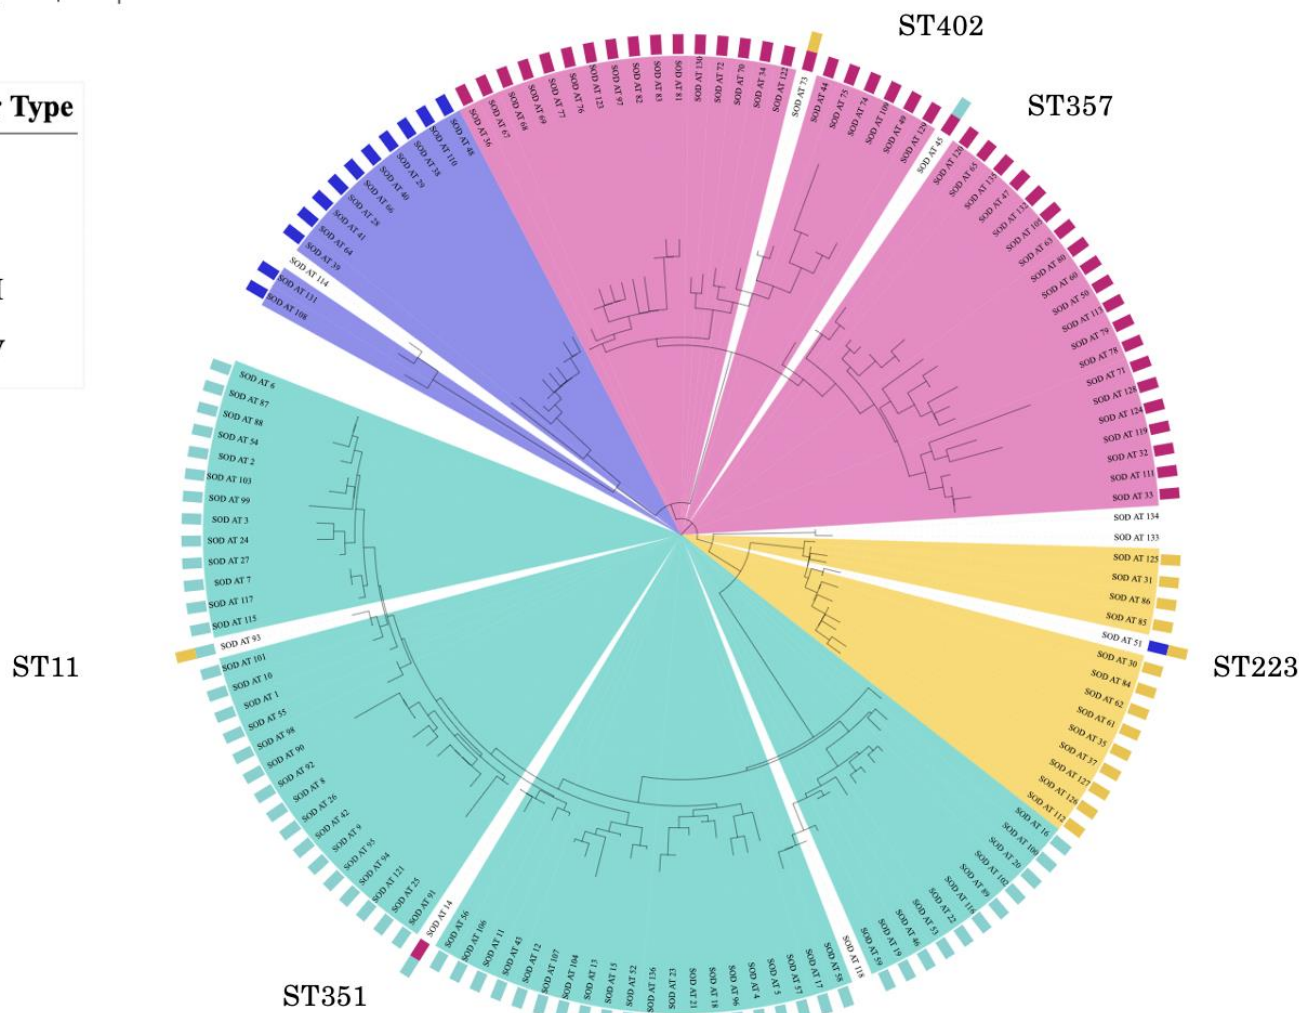

SF5: Phylogenetic tree illustrating the relationship among allele types (AT) found at the *SOD1* locus of the *C. gattii* species complex. Four colours are used to display which lineage each AT is recorded in. Legends on the left indicate which colour corresponds to which lineage.



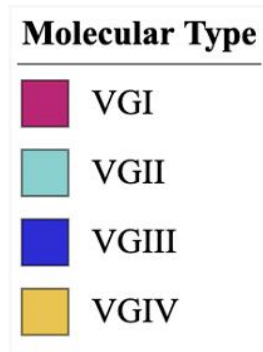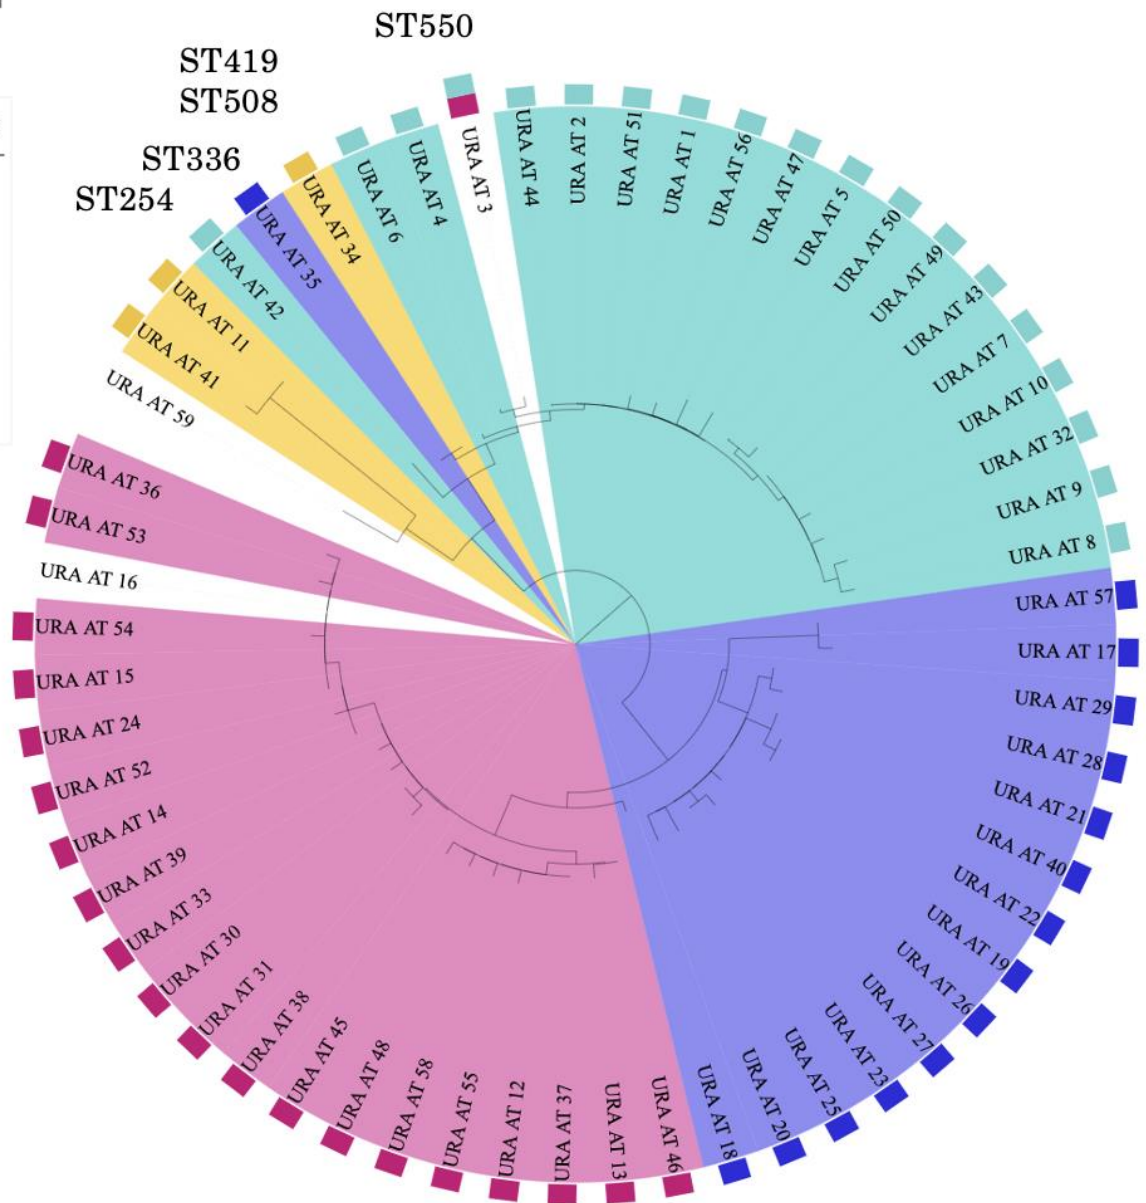

SF6: Phytogenic tree illustrating the relationship among allele types (AT) found at the *URA5* locus of the *C. gattii* species complex. Four colours are used to display which lineage each AT is recorded in. Legends on the left indicate which colour corresponds to which lineage.
